# Supplementary material for: Involvement of spinal muscarinic and serotonergic receptors in the anti-allodynic effect of electroacupuncture in rats with oxaliplatin-induced neuropathic pain
Source: PubMed Central journal article supplement — Korean J Physiol Pharmacol. 2016 Jun 23;20(4):407–14. doi: 10.4196/kjpp.2016.20.4.407 (PMC4930909; doi:10.4196/kjpp.2016.20.4.407), 2016-06-23
Supplement: kjpp-20-407-s001.pdf [file kjpp-20-407-s001.pdf]

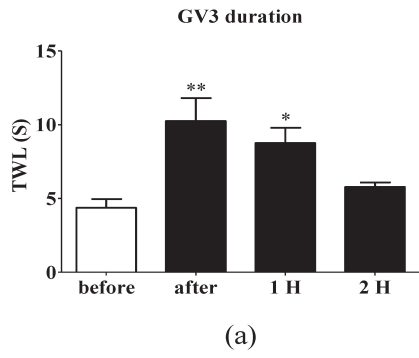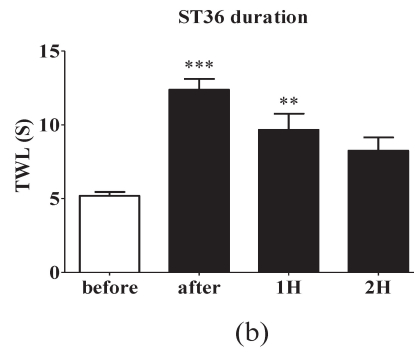

**Supplementary Fig. 1. The duration of the anti-allodynic effect of EA at GV3 and ST36.** Assessment of anti-allodynic effect of EA were performed 20 min, 1, and 2 hours after EA treatment in two groups: (a) GV3 (n=6), (b) ST36 (n=5). The effect of EA at GV3, ST36 lasted until one hour after EA stimulation. Data are presented as mean±S.E.M.; \*\*\*p<0.001, \*\*p<0.01, \*p<0.05; by paired t-test.
