# Supplementary material for: Involvement of spinal muscarinic and serotonergic receptors in the anti-allodynic effect of electroacupuncture in rats with oxaliplatin-induced neuropathic pain
Source: PubMed Central journal article supplement — Korean J Physiol Pharmacol. 2016 Jun 23;20(4):407–14. doi: 10.4196/kjpp.2016.20.4.407 (PMC4930909; doi:10.4196/kjpp.2016.20.4.407), 2016-06-23
Supplement: kjpp-20-407-s002.pdf [file kjpp-20-407-s002.pdf]

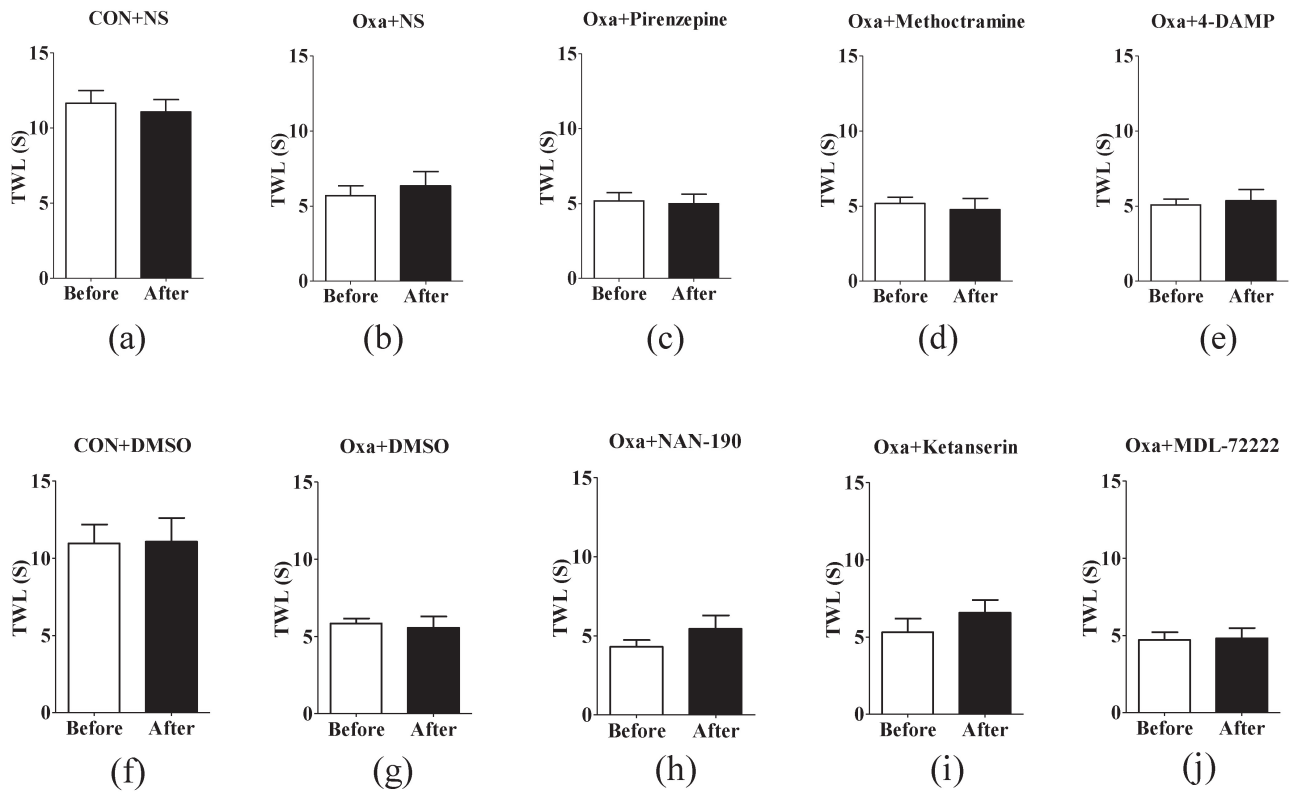

**Supplementary Fig. 2. Effects of muscarinic acetylcholine and serotonergic receptor antagonists.** (a, f) CON refers to non-oxaliplatin treated group. Behavioral tests to measure the cold allodynia were performed before and after the intrathecal injection of muscarinic acetylcholine and serotonergic receptor antagonists in four groups: (b) NS (n=4), (c) pirenzepine (n=9), (d) methoctramine (n=7), and (e) 4-DAMP (n=6). (g) DMSO (n=4), (h) NAN-190 (n=6), (i) ketanserin (n=6), and (j) MDL-72222 (n=6). None of the antagonists affected the pain behavior. Data are presented as mean  $\pm$  S.E.M.
