# Supplementary material for: Involvement of spinal muscarinic and serotonergic receptors in the anti-allodynic effect of electroacupuncture in rats with oxaliplatin-induced neuropathic pain
Source: PubMed Central journal article supplement — Korean J Physiol Pharmacol. 2016 Jun 23;20(4):407–14. doi: 10.4196/kjpp.2016.20.4.407 (PMC4930909; doi:10.4196/kjpp.2016.20.4.407), 2016-06-23
Supplement: kjpp-20-407-s003.pdf [file kjpp-20-407-s003.pdf]

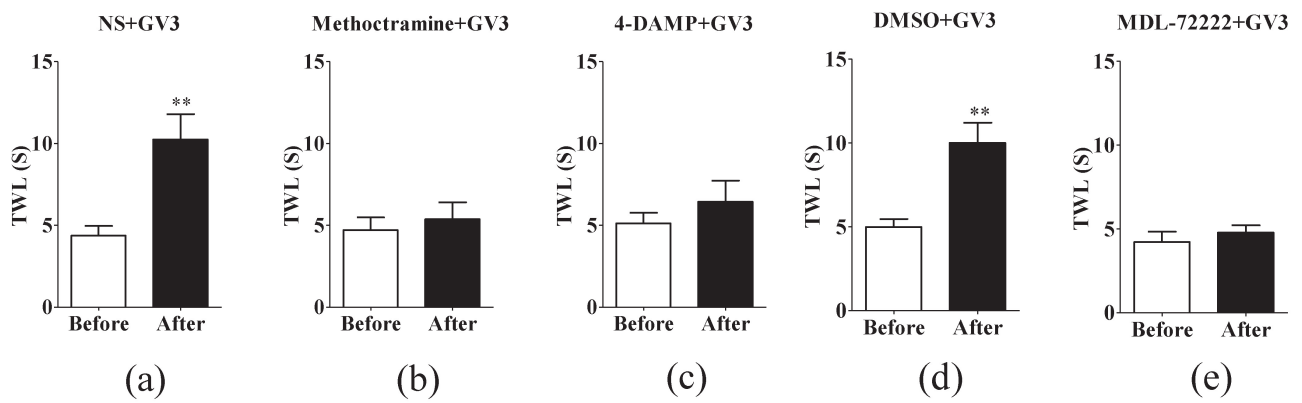

**Supplementary Fig. 3. Effects of spinal muscarinic acetylcholine and serotonergic receptor antagonist on EA (GV3) induced anti-allodynia.** (a, d) NS and DMSO were used as control for muscarinic acetylcholine and serotonergic receptor antagonists, respectively. The behavioral tests for cold allodynia were performed before the intrathecal injection of receptor antagonists and after EA treatment in three groups: (b) methoctramine (n=6), (c) 4-DAMP (n=6), and (e) MDL-72222 (n=6). Data are presented as mean±S.E.M.; \*\*p<0.01; by paired t-test.
